# Supplementary material for: A BODIPY-functionalized PdII photoredox catalyst for Sonogashira C–C cross-coupling reactions
Source: Royal Society of Chemistry journal article supplement (doi:10.1039/c9cc01365b), 2019-01-01
Supplement: c9cc01365b1.pdf [file c9cc01365b1.pdf]

Electronic Supplementary Information

## A BODIPY-functionalized Pd<sup>II</sup> Photoredox Catalyst for Sonogashira C-C Cross-coupling Reactions

Komadhie C. Dissanayake, Peters O. Ebukuyo, Yasser J. Dhahir, Kraig Wheeler and Hongshan He\*

Department of Chemistry and Biochemistry, Eastern Illinois University, Charleston, IL 61920.

### 1. General information

Commercial reagents chloroform (CHCl<sub>3</sub>), dichloromethane (DCM), methanol (MeOH), hexanes and triethylamine (Et<sub>3</sub>N) from Fisher Scientific, 2,3-dichloro-5,6-dicyano-1,4-benzoquinone (DDQ) from Biosynth International Inc., tetrahydrofuran (THF), dimethylformamide (DMF), deuterated chloroform (CDCl<sub>3</sub>), bromobenzene, 1-chloro-4-iodobenzene, 4-iodobenzonitrile, ethyl-4-iodobenzoate, 4-iodoanisole, methyl 4-iodobenzoate, diphenylacetylene, N,N-dimethylformamide from Acros organics, 4-iododbenzonitrile, 4-(phenylethynyl)acetophenone, 3-ethynylbenzonitrile from Alfa Aser, dichloro(1,10-phenanthroline)palladium (II), 4-ethynyl-N,N-dimethylamine, o-tolunitrile from Sigma Aldrich and iodobenzene from Eastman, 48% boron trifluoride diethyl etherate (BF<sub>3</sub> · O(C<sub>2</sub>H<sub>5</sub>)<sub>2</sub>), 2,4 dimethylpyrrole from the TCI were used without further purification unless otherwise stated.

DCM was dried with CaH<sub>2</sub> under nitrogen and distilled prior to use. Chromatographic purification of products was done under gravity on silica gel (70-230 mesh Silica gel). Thin-layer chromatography (TLC) was performed on Silica plated aluminum backed TLC plates. <sup>1</sup>H NMR spectra were recorded on 400 MHz Bruker Avance II- NMR spectrometer and were internally

referenced to  $\text{CDCl}_3$  ( $\delta$  7.26 ppm). Data for  $^1\text{H}$  NMR are reported as follows: chemical shift ( $\delta$  ppm), multiplicity (s = singlet, d = doublet, t = triplet, q = quartet, m = multiplet, dd = doublet of doublets, dt = doublet of triplets, br = broad), coupling constant (Hz), and integration.  $^{31}\text{P}$  NMR spectra were recorded on 400 MHz Bruker Avance II- NMR spectrometer. UV-VIS spectra were recorded on a Cary 100 Series UV-VIS Dual Beam Spectrophotometer over a range of 200-800 nm. Fluorescence spectra were collected on a fluorimeter FS5 from Edinburgh Instruments Inc. Mass spectra were acquired on a Waters Synapt G2-Si ESI MS using 50/50  $\text{H}_2\text{O}/\text{CH}_3\text{CN}$  as solvent with ~0.1% formic acid.

All Sonogashira cross-coupling reactions were carried out under inert atmosphere with the use of standard Schlenk techniques. Great Value LED dimmable E26 light bulb, 13W (1050 Lumens) was used as a light source. The yields of products were analyzed by GC-MS on a Shimadzu GC-MS-QP 2010 SE equipped with a SHRXI-5MS 30 m column, 0.25  $\mu\text{m}$  ID.

GC-MS method: Sample injection: 1  $\mu\text{L}$ . Split ratio, 30-1, although another split ratio of 5:1 was used as appropriate. Temperature program: 75  $^\circ\text{C}$  for 2 minutes then ramped at 20  $^\circ\text{C}$  per minute to 140  $^\circ\text{C}$  then ramped 50  $^\circ\text{C}$  per minute to 300  $^\circ\text{C}$  and held at 300  $^\circ\text{C}$  for 4 minutes. Solvent cut time varied depending on the split ratio used 2.4 minutes to 3.5 minutes.

Cyclic voltammetry experiments were carried out with a Potentiostat/Galvanostat Model 263 A from Princeton Applied research.

## 2. Synthesis

### 2.1 Synthesis of 4,7-diformyl-1,10-phenanthroline (YH1)

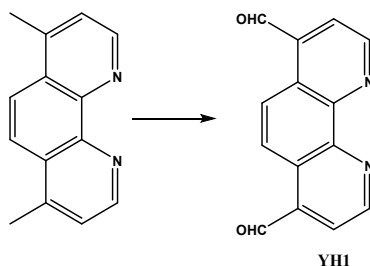

Ligand **YH1** was synthesized according to the literature method with the following modifications. 4,7-Dimethyl-1,10-phenanthroline (1.50 g, 7 mmol) was dissolved in dioxane containing 4% v/v water (100 mL) in a 250 mL round bottom flask and SeO<sub>2</sub> (3.75 g, 34 mmol) was added. The mixture was refluxed for 2 hours at 90 °C and it was filtered while hot. The filtrate was allowed to cool down to room temperature. The yellow solid was filtered out from the solution. Recrystallization from 1,4-dioxane provided the title compound (0.4725 g, 30% yield) as light-yellow powder. <sup>1</sup>H NMR (400 MHz, CDCl<sub>3</sub>) δ 10.54 (s, 2H), 9.54 (d, *J*<sub>H-H</sub> = 4.32 Hz, 2H), 9.23 (s, 2H), 8.09 (d, *J*<sub>H-H</sub> = 4.32 Hz, 2H)

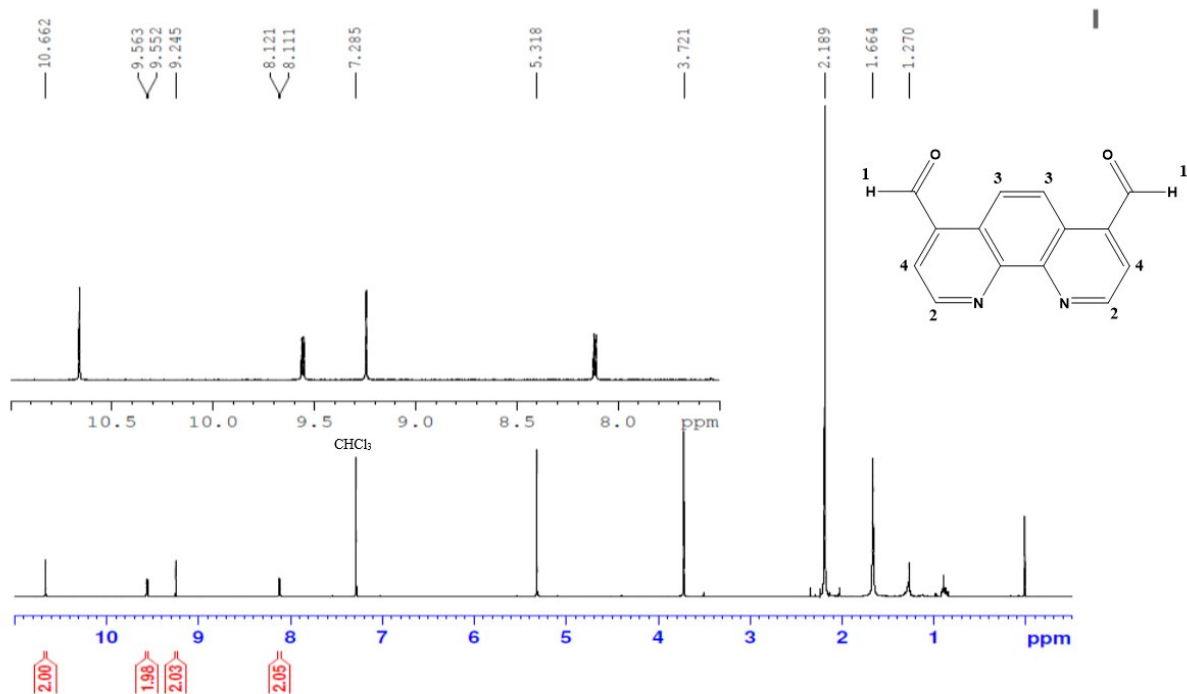

**Figure S1.**  $^1\text{H}$  NMR of 4,7-diformyl-1,10-phenanthroline ( $\text{CDCl}_3$  was used as a solvent)

## 2.2 Synthesis of 4,7-di(4',4''-difluoro-1',3',5',7'-tetramethyl-4'-bora-3'a,4'a-diaza-s-indacene)-1,10-phenanthroline (YH2)

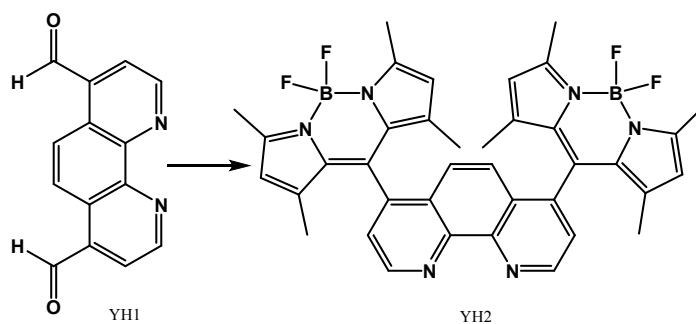

Ligand BDP was synthesized as follows. Compound **YH1** (0.476 g, 1.79 mmol) was added to distilled DCM under  $\text{N}_2$ , followed by 2,4-dimethylpyrrole (0.856 g, 9.03 mmol) and two drops of trifluoroacetic acid. The mixture was stirred overnight at room temperature. 2,3-Dichloro-5,6-dicyano-1,4-benzoquinone (0.915 g, 4.00 mmol) was dissolved in 15 mL of DCM and was slowly

added to the reaction mixture. After stirring the mixture for one-hour triethylamine (8.0 mL, 57 mmol) was added. Stirring was continued for 30 min and afterwards 48 %  $\text{BF}_3 \cdot \text{O}(\text{C}_2\text{H}_5)_2$  (8.0 mL, 31 mmol) was added to the mixture, and a strong green fluorescence was immediately observed under flash light. The reaction mixture was stirred for 3 hours at room temperature before removing the solvent under vacuum. The crude product was purified via column chromatography with  $\text{DCM}/\text{MeOH}$  (v:v, 200:5) and  $\text{CHCl}_3/\text{MeOH}$  (v:v, 100:1). The product containing fraction which showed green fluorescence was subjected to vacuum to remove the solvent and the recrystallization of the resultant solid with MeOH provided the title compound (0.175 g, 15% yield) as orange solid.

$^1\text{H}$  NMR (400 MHz,  $\text{CDCl}_3$ )  $\delta$  9.36 (d,  $J=4.44$  Hz, 2H), 7.84 (s, 2H), 7.695 (d,  $J=4.44$  Hz 2H), 5.97 (s, 2H), 2.58 (s, 3H), 1.09 (s, 3H); ESI HRMS ( $m^+/z$ , 673.3055, calcd, 673.3045).

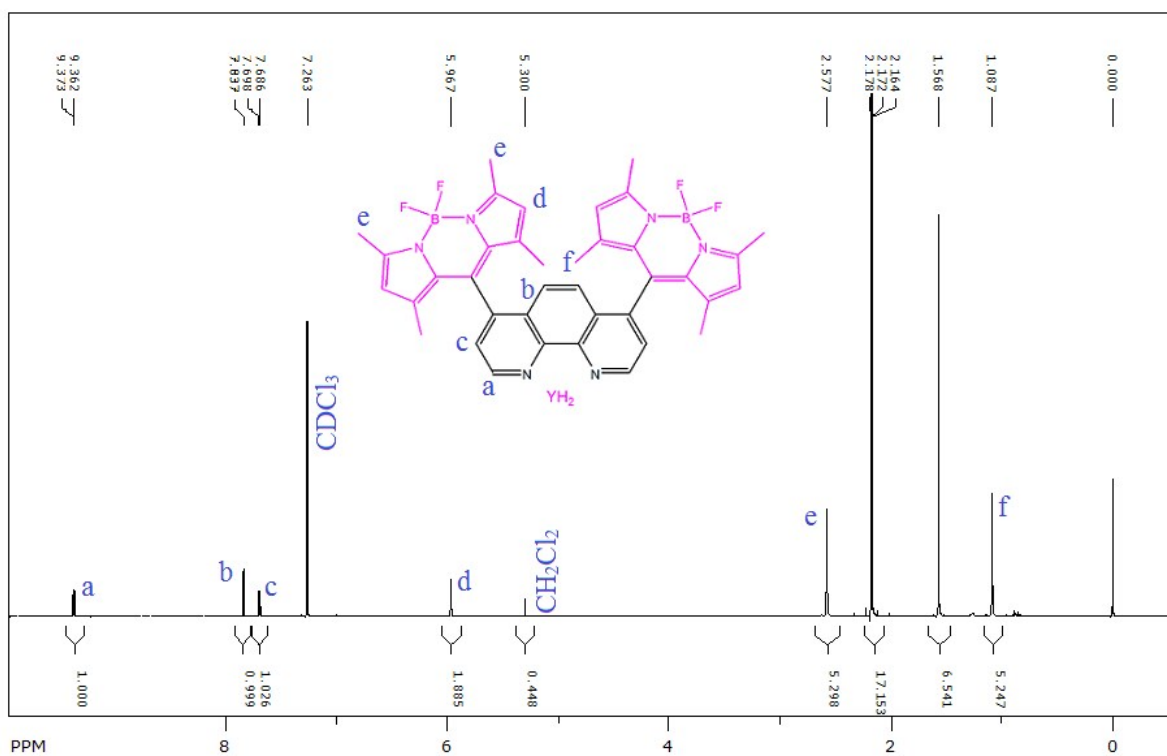

Figure S2.  $^1\text{H}$  NMR in  $\text{CDCl}_3$  spectrum of YH2

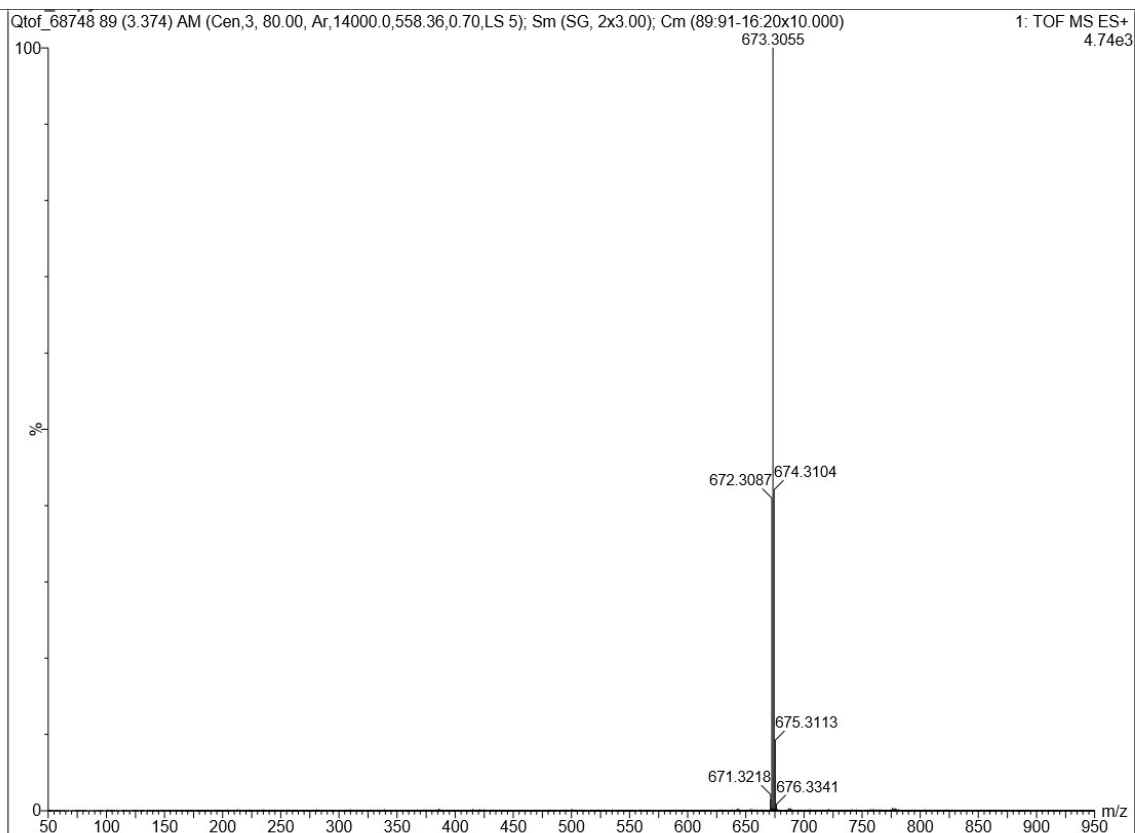

**Figure S3.** ESI HR-MS spectra of YH2

### 2.3 Synthesis of dichloro(4,7-di(4',4''-difluoro-1',3',5',7'-tetramethyl-4'-bora-3'a,4'a-diaza-s-indacene)-1,10-phenanthroline)palladium(II) (**1**)

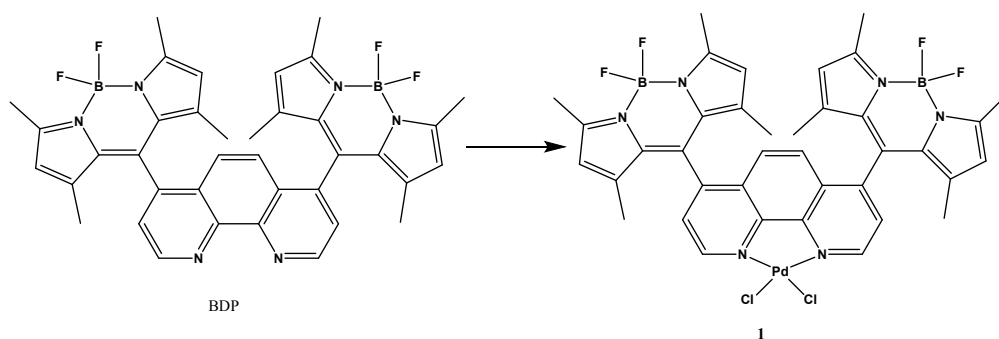

Catalyst **1** was synthesized as follows. Bis(benzonitrile)dichloropalladium(II) (0.844 mg, 2.20 mmol) was dissolved in CHCl<sub>3</sub> in a 250 mL RBF. Ligand **BDP** (0.138 g, 2.01 mmol) was added

to the mixture. The mixture was stirred at room temperature under dark for 3 hours. Upon completion of the reaction, the solvent was removed under vacuum. The crude product was purified via column chromatography with DCM/MeOH (v:v, 200:5). The product containing fraction was subjected to vacuum to remove the solvent and the recrystallization of the resultant solid with MeOH provided the title compound (0.155 g, 91% yield) as an orange solid.

**<sup>1</sup>H NMR** (400 MHz, CDCl<sub>3</sub>) δ 9.865 (d, *J* = 5.36 Hz, 2H), 7.98 (s, 2H), 7.97 (s, 2H), 6.01 (s, 2H), 2.57 (s, 3H), 1.07 (s, 3H)

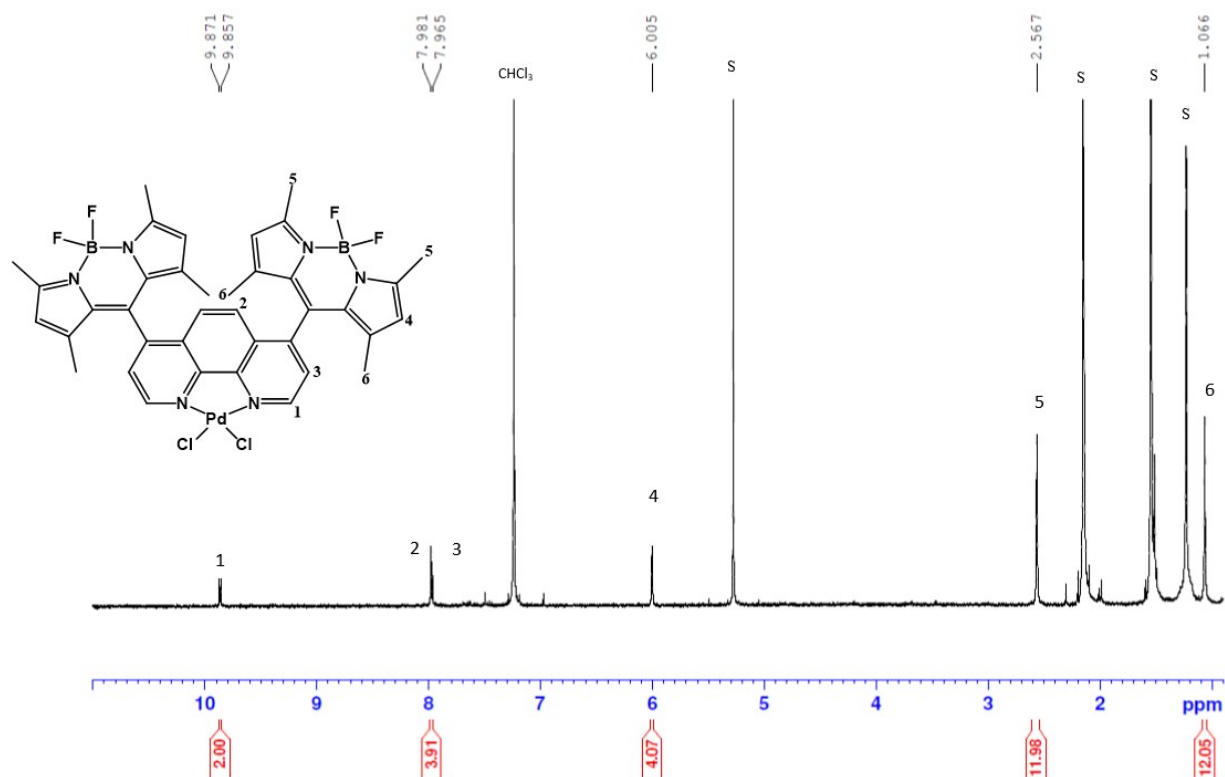

**Figure S4.** <sup>1</sup>H NMR spectrum of YH2-Pd in CDCl<sub>3</sub>.

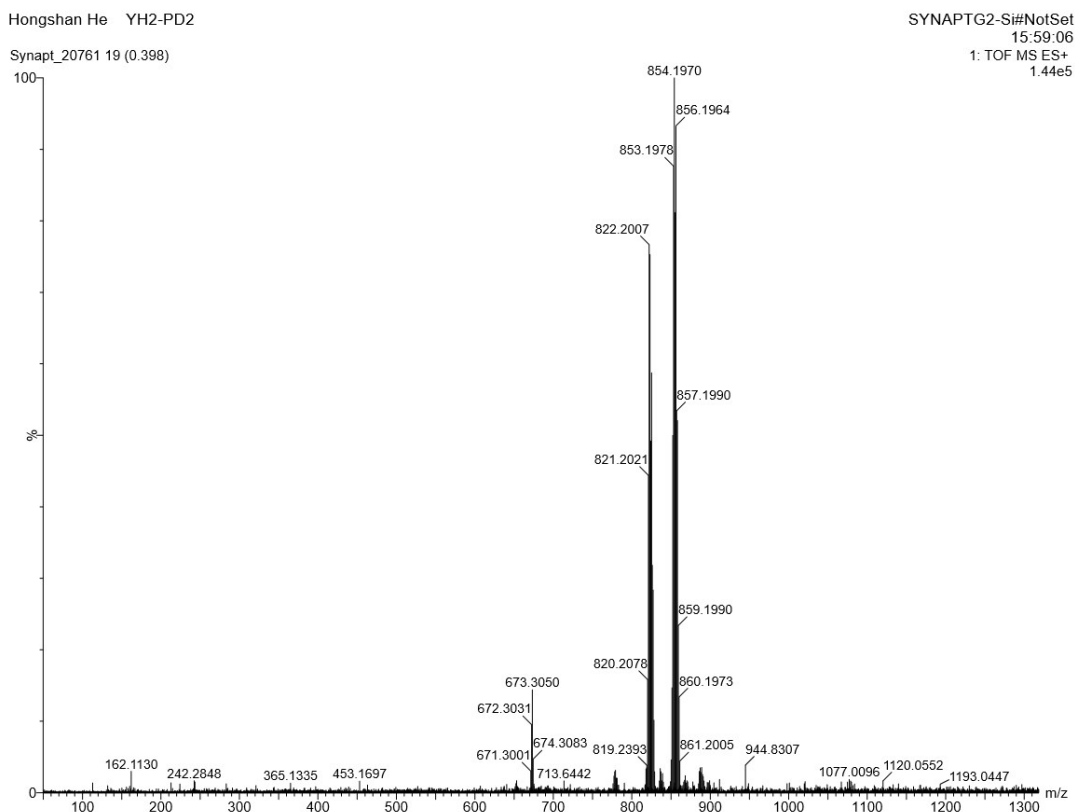

**Figure S5.** ESI-MS of YH2-Pd (CH<sub>3</sub>CN and formic acid were used during data acquisition). The 854.1970 and 822.2007, and 673.3050 corresponded to [M-Cl+CH<sub>3</sub>CN]<sup>+</sup>, [M - 2Cl + COOH]<sup>+</sup> and [M-Pd - 2Cl + H<sup>+</sup>]<sup>+</sup> fragments.

### 3. Spectral and electrochemical measurements

Solutions of **BDP** ( $4 \times 10^{-6}$  mol/L), **1** ( $5 \times 10^{-6}$  mol/L) and a supernatant of a saturated solution of a dichloro(1,10-phenanthroline) palladium (II) in DCM were used to obtain UV-VIS spectra for the preceding compounds. To monitor the reaction, catalyst **1** (4.2 mg, 0.005 mmol, 0.005 equiv) was added to a Schlenk flask (50 mL) fitted with a rubber stopper. The vessel was degassed and filled with N<sub>2</sub>. All the manipulations hereafter was carried under Ar conditions inside the glove box. DMF (4 mL) was added to the flask followed by Et<sub>3</sub>N (1 mL, 7.11 mmol, 7.11 equiv) and

PPh<sub>3</sub> (0.5 mL of a 0.01M solution in DMF, 0.05 mmol, 0.05 equiv). The stirred mixture was irradiated using a 13 W LED lamp. UV-VIS spectra were obtained in 0, 10, 60, 120, 240 min time intervals after irradiation. Samples for UV-VIS were prepared by diluting 15  $\mu$ L of the reaction mixture in a 2.5 mL DCM solution in a quartz cuvette at each time interval.

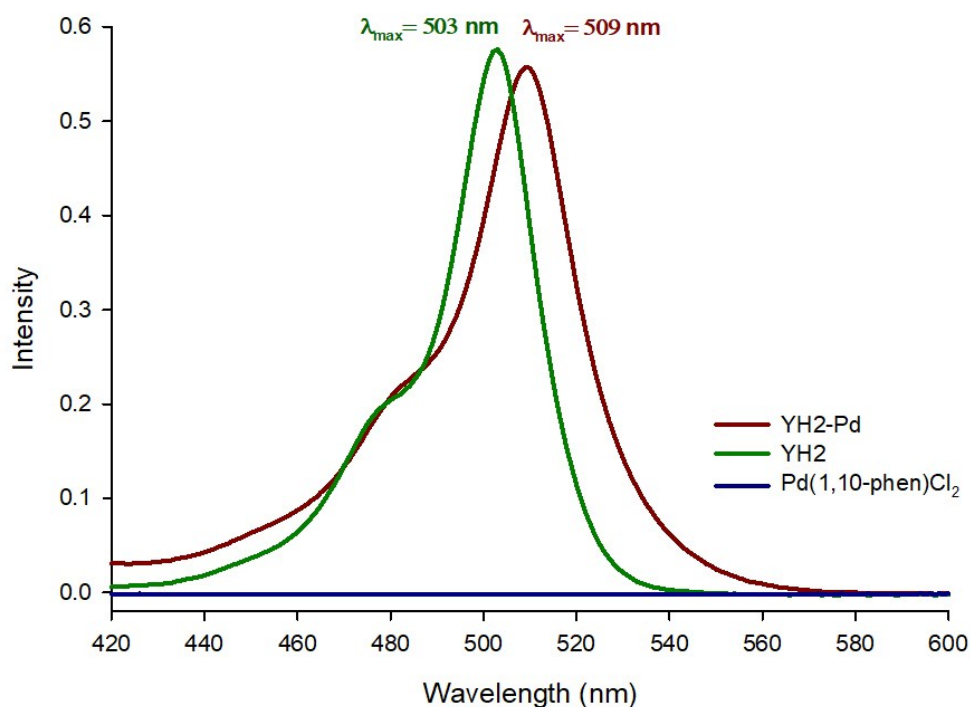

**Figure S6 (Original S1).** Absorption spectra for BDP (labeled as YH2) ( $4.2 \times 10^{-6}$  mol/L), compound 1 (labeled as YH2-Pd) ( $2.1 \times 10^{-6}$  mol/L) and [Pd(1,10-phen)Cl<sub>2</sub>] (saturated solution) in DCM

Emission and excitation spectra for ligand **BDP** and catalyst **1** were recorded. Stock solutions of ligand **BDP** ( $1.74 \times 10^{-4}$  mol/L) and catalyst **1** ( $1.00 \times 10^{-4}$  mol/L) were prepared and 60  $\mu$ L and 50  $\mu$ L from the stock solutions were diluted in 2.5 mL DCM to give  $4.00 \times 10^{-6}$  mol/L and  $2.08 \times 10^{-6}$  mol/L, respectively. Ligand **BDP** emission spectra was recorded at a fixed excitation

wavelength of 375.00 nm while scanning from 400.00 nm to 700.00 nm. Excitation spectrum was recorded with a fixed emission wavelength at 620 nm while scanning in 350-600 nm range.

Catalyst **1** emission spectrum was recorded at a fixed excitation wavelength of 371.40 nm while scanning from 400 nm to 750 nm Excitation spectrum was recorded with a fixed emission wavelength at 600 nm while scanning in 350-585 nm range.

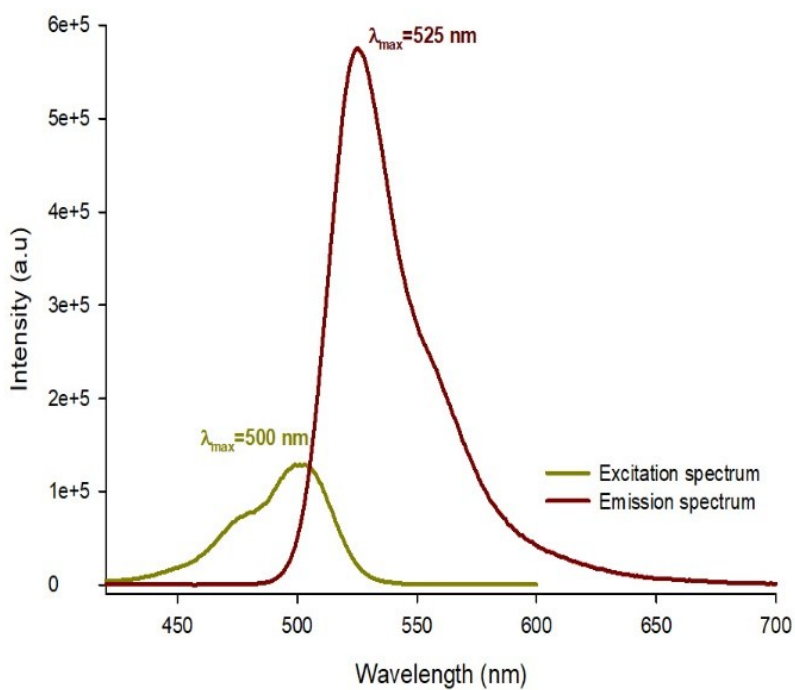

(a)

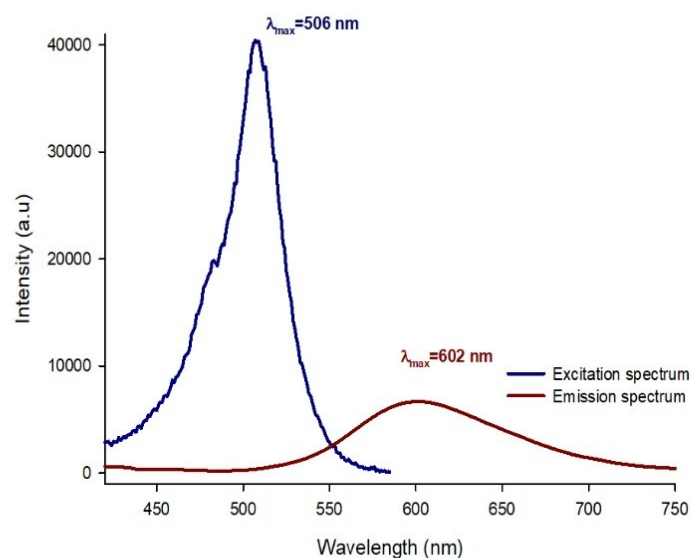

(b)

**Figure S7 (original S2)** Fluorescence spectra for BDP (4 × 10<sup>-6</sup> mol/L) (a) and compound **1** (2.08 × 10<sup>-6</sup> mol/L) (b) in DCM. BDP with an excitation wavelength of 375.00 nm and emission wavelength at 620 nm and compound **1** with an excitation wavelength of 371.40 nm emission wavelength at 600 nm

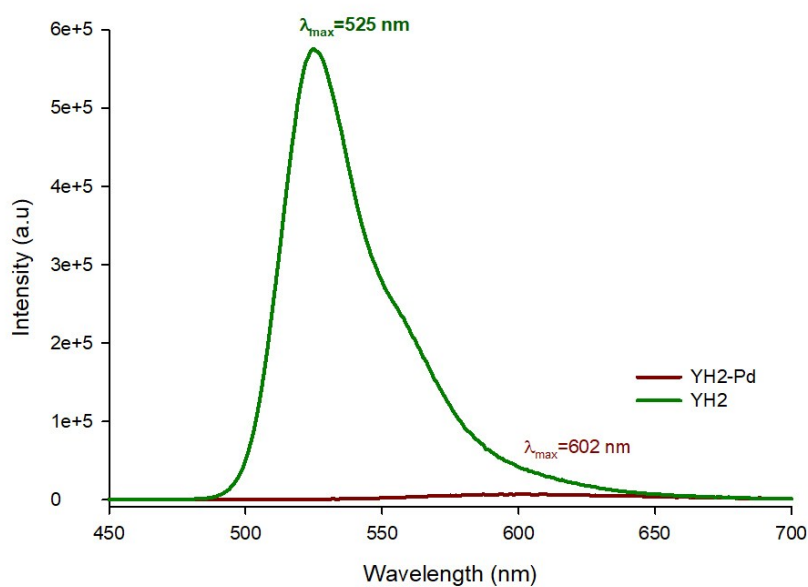

**Figure S8 (original S3).** Comparison of emission spectra of BDP (labeled as YH2) ( $4 \times 10^{-6}$  mol/L) (green) and **1** (Labeled as YH2-Pd) ( $2.08 \times 10^{-6}$  mol/L) (red) in DCM.  $\lambda_{\text{ex}} = 375.00$  nm

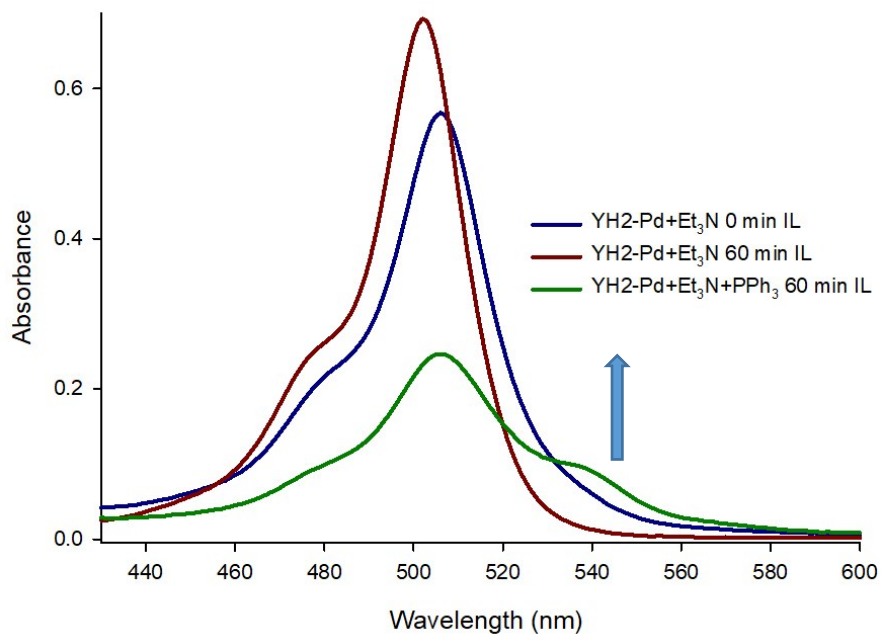

**Figure S9 (Original S4).** Monitoring the reaction with time upon addition of Et<sub>3</sub>N and PPh<sub>3</sub> consecutively with illuminating (IL) the reaction mixture with compound **1** ( $3.04 \times 10^{-6}$  mol/L) in DMF. The catalyst **1** was labeled as YH2-Pd.

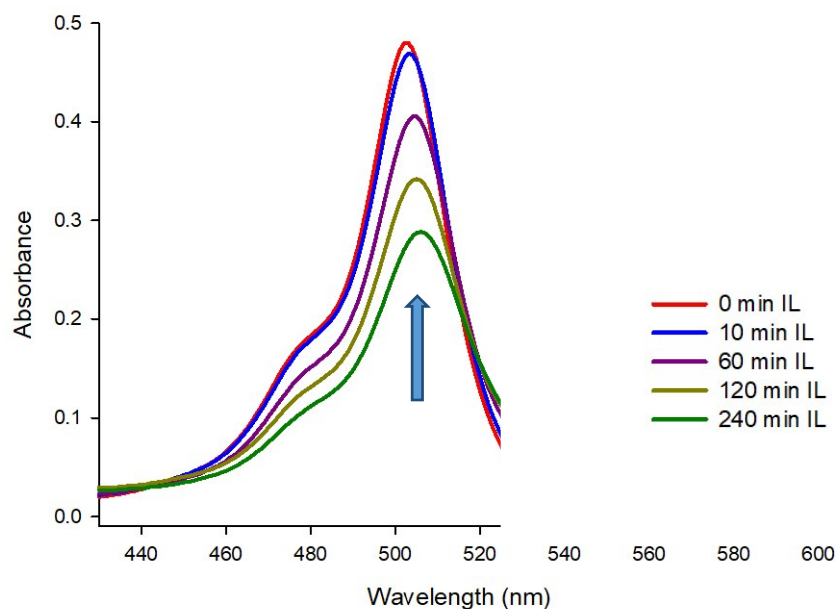

**Figure S10 (original S5).** Monitoring the formation of the unidentified species upon addition of  $\text{Et}_3\text{N}$  and  $\text{PPh}_3$  with compound **1** ( $3.04 \times 10^{-6}$  mol/L) in DMF

#### 4. Monitoring the reduction of Pd(II) with $^{31}\text{P}$ NMR studies

Catalyst **1** (8.5 mg, 0.025 mmol, 0.025 equiv) was added to a Schlenk flask (50 mL) fitted with a rubber stopper. The vessel was degassed and filled with  $\text{N}_2$  followed by the addition of DMF (4 mL). Then  $\text{Et}_3\text{N}$  (1 mL, 7.11 mmol, 7.11 equiv) and  $\text{PPh}_3$  (x=2, 4.0 mg, 0.05 mmol, 0.05 equiv) were added respectively via syringes to the stirred reaction mixture under  $\text{N}_2$  conditions. After irradiating the sample for four hours  $\text{CDCl}_3$  (~ 0.5 mL) was added to the reaction mixture in the glove box and the NMR tube was prepared.

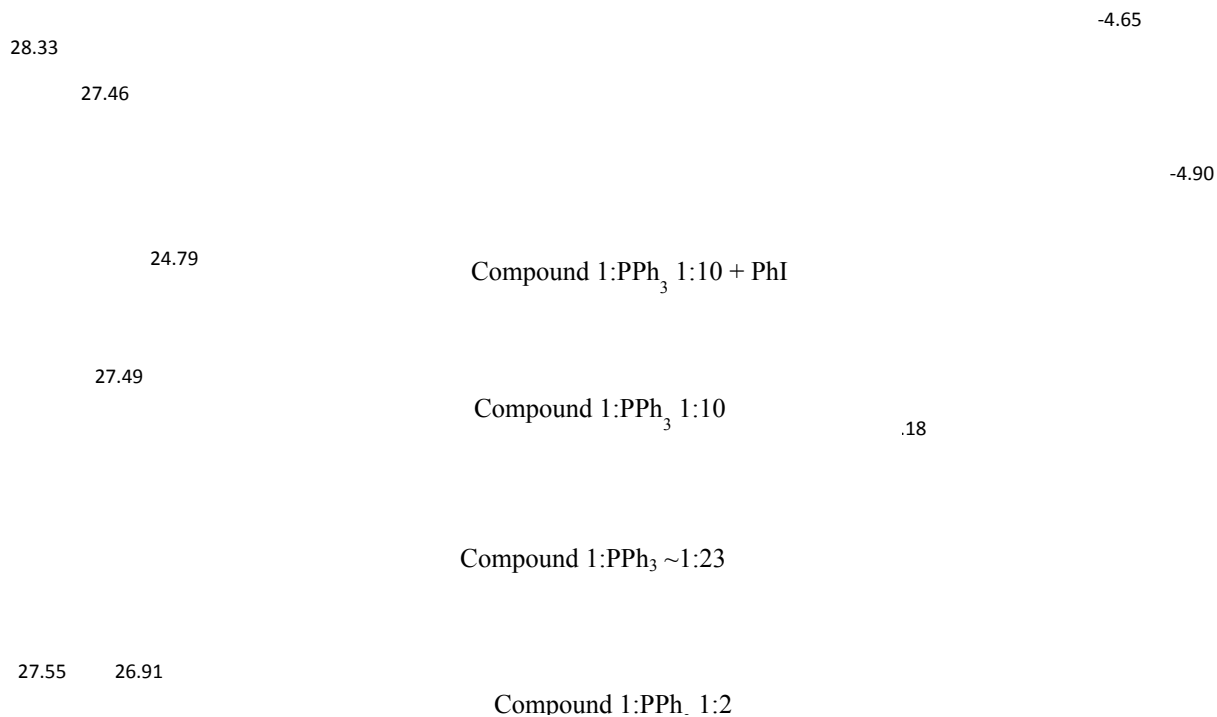

**Figure S11 (Original S6).**  $^{31}\text{P}$  NMR spectra for systems with different Pd/PPh<sub>3</sub> molar ratios

## 5. Electrochemical procedure for cyclic voltammetry

Experiments were carried out in a three-electrode cell with Pt working electrode, Ag wire reference electrode at room temperature connected to a N<sub>2</sub> supply. All three compartments were filled with nBu<sub>4</sub>NBF<sub>4</sub> (0.1 M) in acetonitrile followed by purging N<sub>2</sub> for 20 minutes. To the working electrode containing compartment, the compound of interest (~ 4mg) and ferrocene were introduced. Cyclic voltammetry was performed at 100 mVs<sup>-1</sup>.

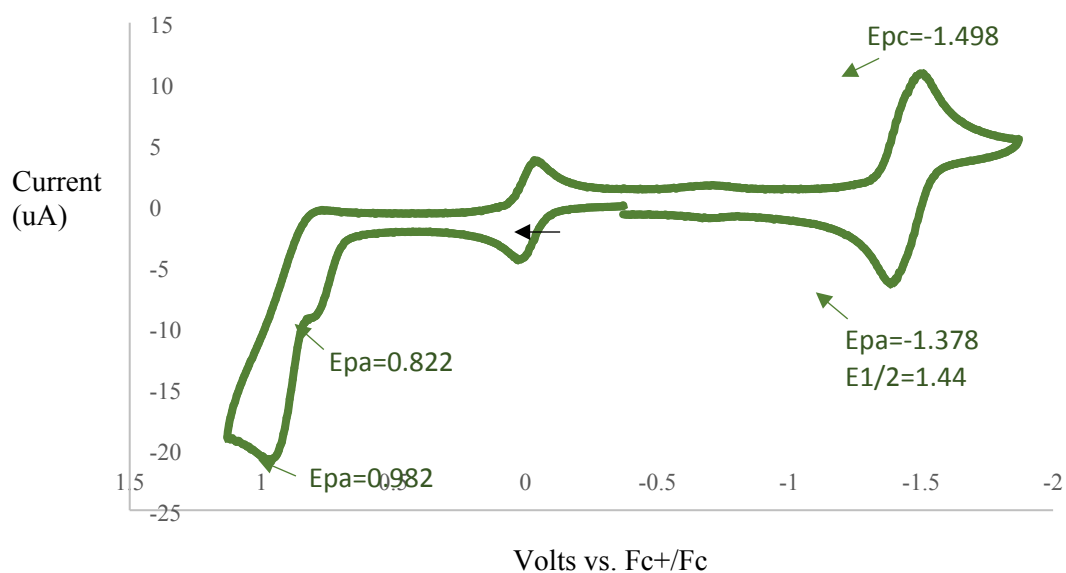

**Figure S12 (Original S7).** Cyclic voltammogram for BDP in MeCN / 0.1 M N-Bu<sub>4</sub>PF<sub>6</sub>, W: Pt disk, Aux: Pt wire, Ref: Ag wire, Scan rate = 100 mV/s

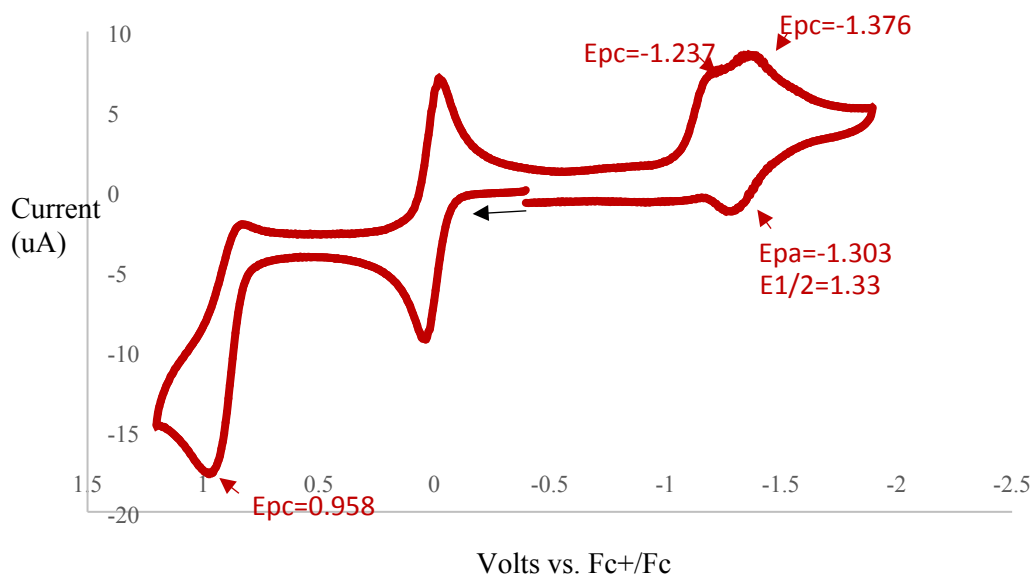

**Figure S13 (Original S8).** Cyclic voltammogram for 1 in MeCN / 0.1 M N-Bu<sub>4</sub>PF<sub>6</sub>, W: Pt disk, Aux: Pt wire, Ref: Ag wire, Scan rate = 100 mV/s

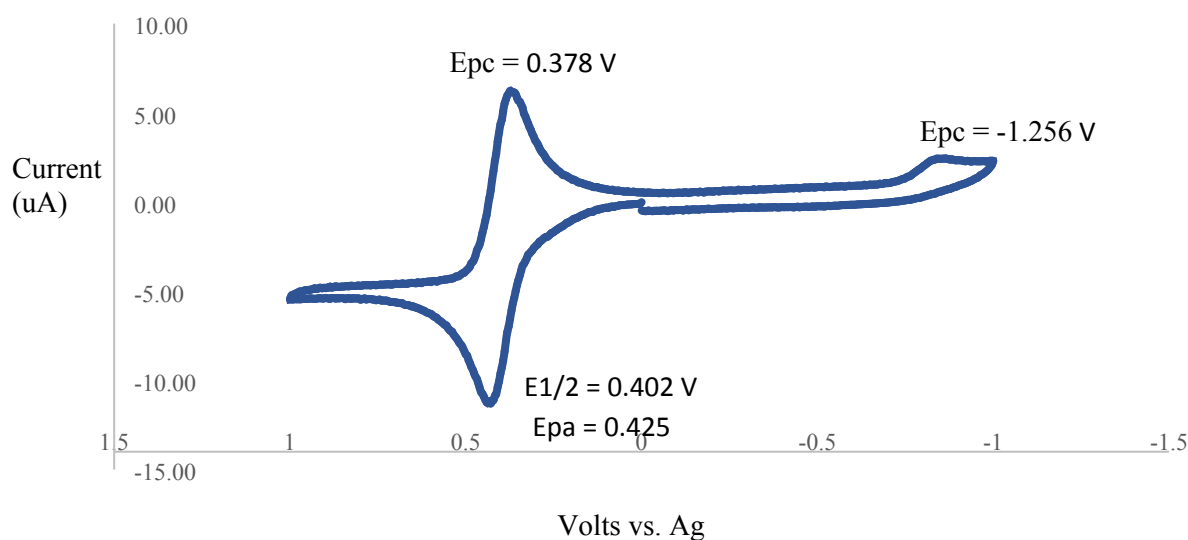

**Figure S14 (Original S9)** Cyclic voltammogram for  $[\text{Pd}(1,10\text{-phen})\text{Cl}_2]$  in MeCN / 0.1 M N-Bu<sub>4</sub>PF<sub>6</sub>, W: Pt disk, Aux: Pt wire, Ref: Ag wire, Scan rate = 100 mV/s

**Table S1:** photophysical and electrochemical properties of BDP and the catalyst **1**

| Compound | $\lambda_{\text{max}}(\text{ab})/\text{nm}$ | $\epsilon^*/10^5\text{Lmol}^{-1}\text{cm}^{-1}$ | $\lambda_{\text{max}}(\text{fl})/\text{nm}$ | $E_{1/2}(\text{Fc}/\text{Fc}^+)$ |      |
|----------|---------------------------------------------|-------------------------------------------------|---------------------------------------------|----------------------------------|------|
|          |                                             |                                                 |                                             | A/A-                             | A/A+ |
| BDP      | 503                                         | 1.38615                                         | 525                                         | -1.44                            | 0.88 |
| <b>1</b> | 509                                         | 1.13808                                         | 602                                         | -1.33                            | 0.89 |

## 6. Sonogashira C-C cross coupling reactions

Representative procedure for coupling of phenylacetylene and iodobenzene. Catalyst **1** (4.2 mg, 0.005 mmol) was added to a Schlenk flask (50 mL) with a rubber stopper. The vessel was degassed and filled with N<sub>2</sub> for 5 times followed by the addition of dry DMF (4 mL). Then iodobenzene (0.111 mL, 1 mmol), Et<sub>3</sub>N (1 mL, 7 mmol), PPh<sub>3</sub> (0.5 mL of a 0.01M solution in DMF, 0.05 mmol)

and phenylacetylene (0.130 mL, 1.2 mmol) were added via syringes sequentially to the stirred reaction mixture. Irradiation with visible light was carried out using a 13W white light LED lamp.

Analysis of the products in 4, 17 and 24 hours were carried out using GC-MS. At each time interval two samples were prepared by mixing 10  $\mu$ L of the reaction mixture in a 50-ppm solution of benzonitrile in DCM (1.5 mL) in a GC-MS vial. Calibration curves were prepared according to the equation 1 given below using 2-methylbenzonitrile as the standard. A solution series of 10, 20, 30, 40, 50 ppm iodobenzene, phenylacetylene and diphenylacetylene were prepared in 50 ppm 2-methylbenzonitrile. Area of standard signal/concentration of the standard vs plotted against the area of analyte signal/concentration of analyte to diphenylacetylene, iodobenzene and phenylacetylene to give the below equations

$$\frac{\text{Area of the analyte signal}}{\text{Concentration of the analyte}} = F \times \frac{\text{Area of the standard signal}}{\text{Concentration of the standard}}$$

A direct relationship between the standard area/ standard concentration to product area/ product concentration was used instead of calibration curves. Two samples were analyzed and the average of the results from two samples were taken.

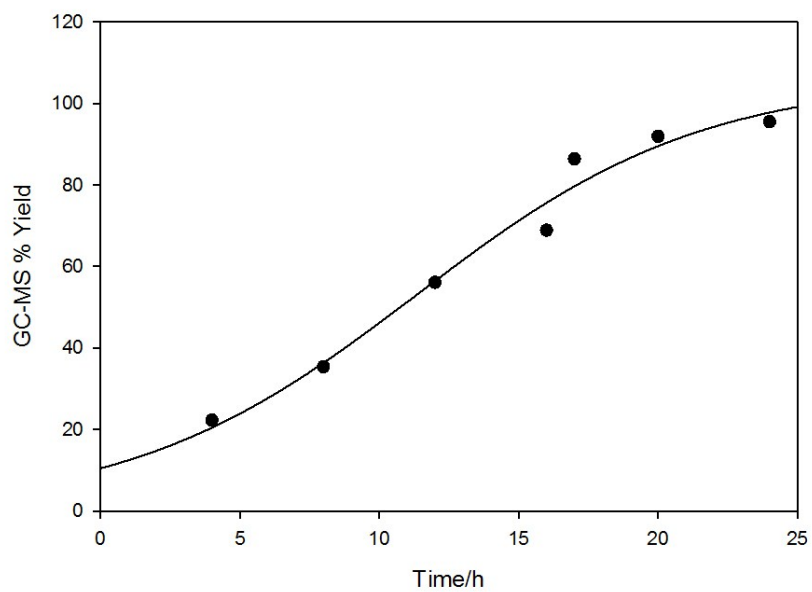

**Figure S15 (Original S10).** Reaction progress of a reaction between iodobenzene and phenylacetylene with time monitored with GC-MS

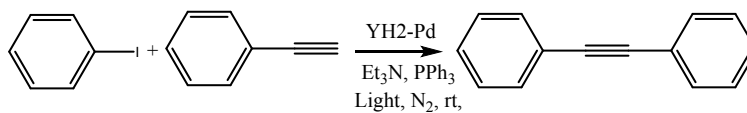

Sample Information  
 Analyzed : 7/3/2017 12:27:45 PM  
 Sample Name : KC027\_R\_a\_4h  
 Sample ID : KC027\_R\_a\_4h  
 Vial # : 2  
 Injection Volume : 1.00  
 Data File : C:\GCMSsolution\Data\He group\KC027\_R\_aa\_4h.qgd  
 Method File : C:\GCMSsolution\Data\He group\hp inj 30-1 split 75o start slow then fast ramp.c  
 Tuning File : C:\GCMSsolution\System1\autotune04\_28\_17.qgt  
 Comment :

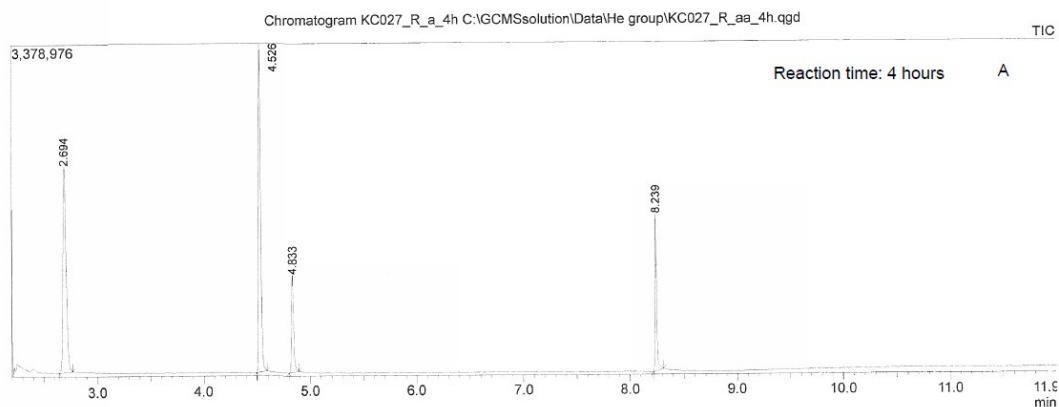

Peak Report TIC

| Peak# | R.Time | Area     | Area%  | Name                    |
|-------|--------|----------|--------|-------------------------|
| 1     | 2.694  | 4366946  | 36.86  | Phenylethyne            |
| 2     | 4.526  | 4540514  | 38.32  | Benzene, iodo-          |
| 3     | 4.833  | 1320102  | 11.14  | Benzonitrile, 2-methyl- |
| 4     | 8.239  | 1621363  | 13.68  | Diphenylacetylene       |
|       |        | 11848925 | 100.00 |                         |

Sample Information  
 Analyzed : 7/3/2017 1:00:08 PM  
 Sample Name : KC027\_R\_b\_4h  
 Sample ID : KC027\_R\_b\_4h  
 Vial # : 4  
 Injection Volume : 1.00  
 Data File : C:\GCMSsolution\Data\He group\KC027\_R\_bb\_4h.qgd  
 Method File : C:\GCMSsolution\Data\He group\hp inj 30-1 split 75o start slow then fast ramp.c  
 Tuning File : C:\GCMSsolution\System1\autotune04\_28\_17.qgt  
 Comment :

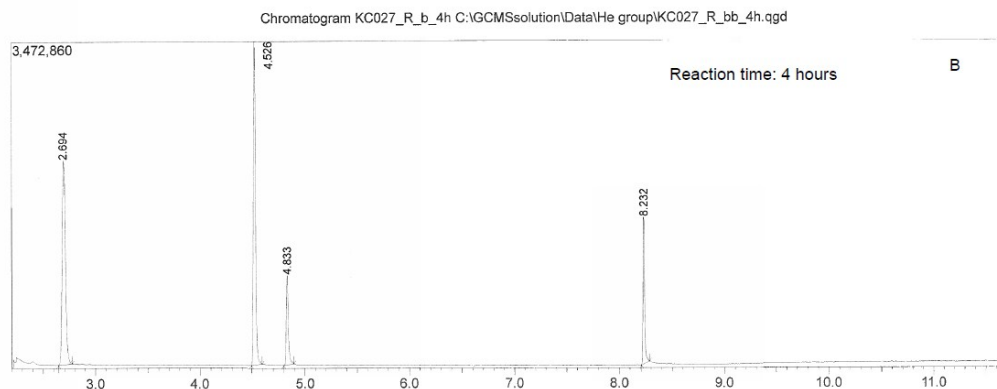

Peak Report TIC

| Peak# | R.Time | Area     | Area%  | Name                    |
|-------|--------|----------|--------|-------------------------|
| 1     | 2.694  | 4537337  | 37.61  | Phenylethyne            |
| 2     | 4.526  | 4855160  | 38.59  | Benzene, iodo-          |
| 3     | 4.833  | 1274269  | 10.56  | Benzonitrile, 2-methyl- |
| 4     | 8.232  | 1597532  | 13.24  | Diphenylacetylene       |
|       |        | 12064298 | 100.00 |                         |

Figure S16. GC-MS results for the reactions between iodobenzene and phenylacetylene in DMF for 4 hr.

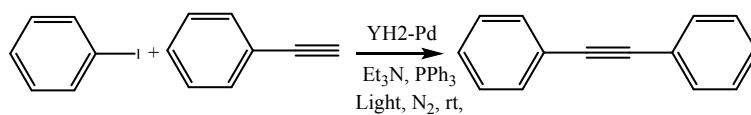

Sample Information  
 Analyzed : 6/23/2017 10:19:45 AM  
 Sample Name : KC024R\_17hR  
 Sample ID : KC024R\_4hR  
 Vial # : 1  
 Injection Volume : 1.00  
 Data File : C:\GCMSsolution\Data\He group\KC024R\_17hR.qgd  
 Method File : C:\GCMSsolution\Data\He group\hp inj 30-1 split 75o start slow then fast ramp.q  
 Tuning File : C:\GCMSsolution\System1\autotune 06\_23\_17\_1.qgt  
 Comment :

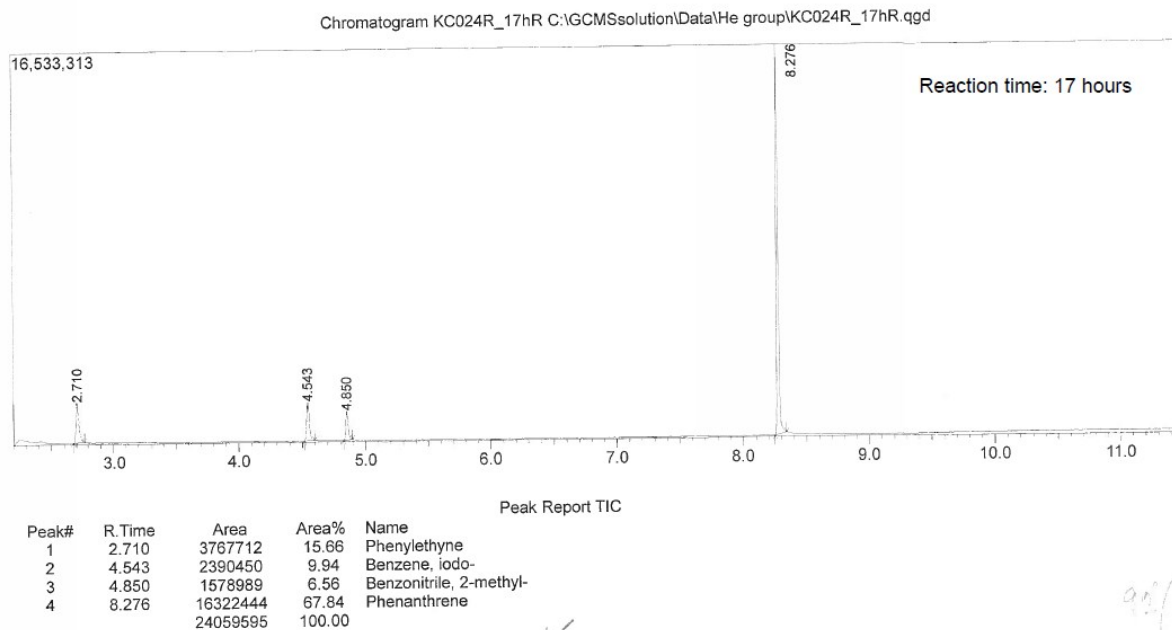

**Figure S17.** GC-MS results for the reaction between iodobenzene and phenylacetylene in DMF for 17 hr.

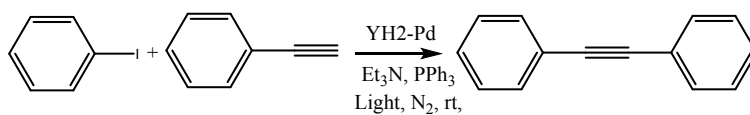

Sample Information  
 Analyzed : 6/23/2017 11:06:21 AM  
 Sample Name : KC024R\_20h\_b  
 Sample ID : KC024R\_20h\_b  
 Vial # : 3  
 Injection Volume : 1.00  
 Data File : C:\GCMSsolution\Data\He group\KC024R\_20h\_b.qgd  
 Method File : C:\GCMSsolution\Data\He group\hp inj 30-1 split 75o start slow then fast ramp.c  
 Tuning File : C:\GCMSsolution\System\Tune1\autotune 06\_23\_17\_1.qgt  
 Comment :

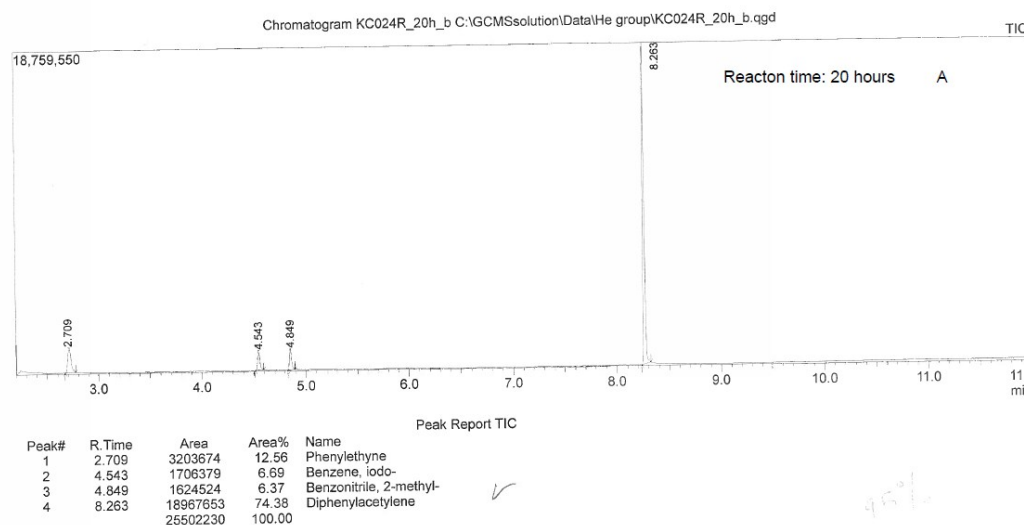

Sample Information  
 Analyzed : 6/23/2017 10:35:54 AM  
 Sample Name : KC024R\_20h\_a  
 Sample ID : KC024R\_20h\_a  
 Vial # : 2  
 Injection Volume : 1.00  
 Data File : C:\GCMSsolution\Data\He group\KC024R\_20h\_a.qgd  
 Method File : C:\GCMSsolution\Data\He group\hp inj 30-1 split 75o start slow then fast ramp.c  
 Tuning File : C:\GCMSsolution\System\Tune1\autotune 06\_23\_17\_1.qgt  
 Comment :

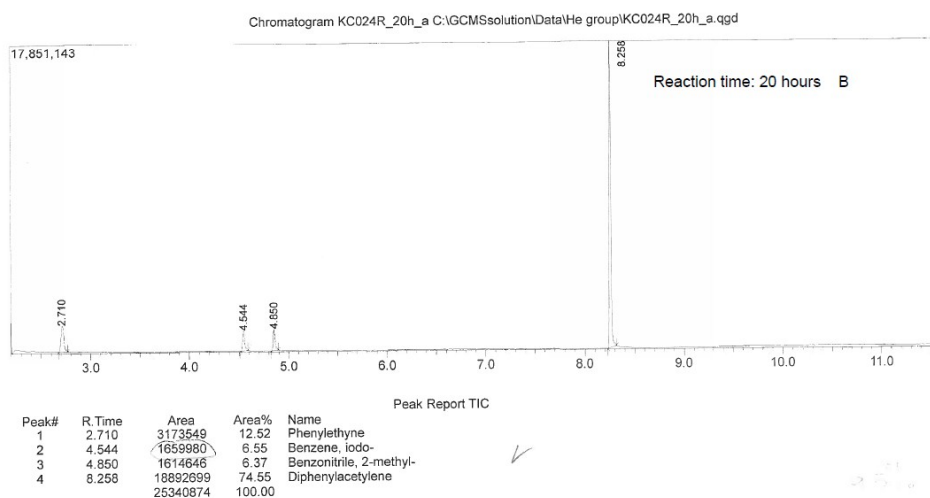

**Figure S18.** GC-MS results for the reaction between iodobenzene and phenylacetylene in DMF for 20 hr.



Sample Information  
 Analyzed : 6/23/2017 2:27:19 PM  
 Sample Name : KC024R\_24h\_a  
 Sample ID : KC024R\_24h\_a  
 Vial # : 1  
 Injection Volume : 1.00  
 Data File : C:\GCMSsolution\Data\He group\KC024R\_24h\_a.qgd  
 Method File : C:\GCMSsolution\Data\He group\hp inj 30-1 split 750 start slow then fast ramp.q  
 Tuning File : C:\GCMSsolution\System\Tune1\autotune 06\_23\_17\_1.qgt  
 Comment :

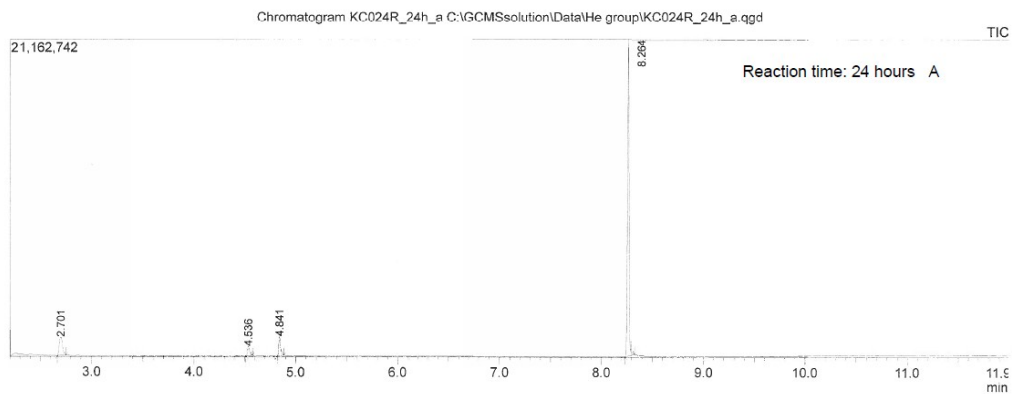

| Peak# | R. Time | I. Time | F. Time | Area     | Area%  | Name                    |
|-------|---------|---------|---------|----------|--------|-------------------------|
| 1     | 2.701   | 2.665   | 2.755   | 2615991  | 9.86   | Phenylethyne            |
| 2     | 4.536   | 4.510   | 4.575   | 906190   | 3.42   | Benzene, iodo-          |
| 3     | 4.841   | 4.815   | 4.885   | 1663966  | 6.27   | Benzonitrile, 2-methyl- |
| 4     | 8.264   | 8.235   | 8.325   | 21332643 | 80.44  | Diphenylacetylene       |
|       |         |         |         | 26518690 | 100.00 |                         |

Sample Information  
 Analyzed : 6/23/2017 2:43:27 PM  
 Sample Name : KC024R\_24h\_b  
 Sample ID : KC024R\_24h\_b  
 Vial # : 2  
 Injection Volume : 1.00  
 Data File : C:\GCMSsolution\Data\He group\KC024R\_24h\_b.qgd  
 Method File : C:\GCMSsolution\Data\He group\hp inj 30-1 split 750 start slow then fast ramp.q  
 Tuning File : C:\GCMSsolution\System\Tune1\autotune 06\_23\_17\_1.qgt  
 Comment :

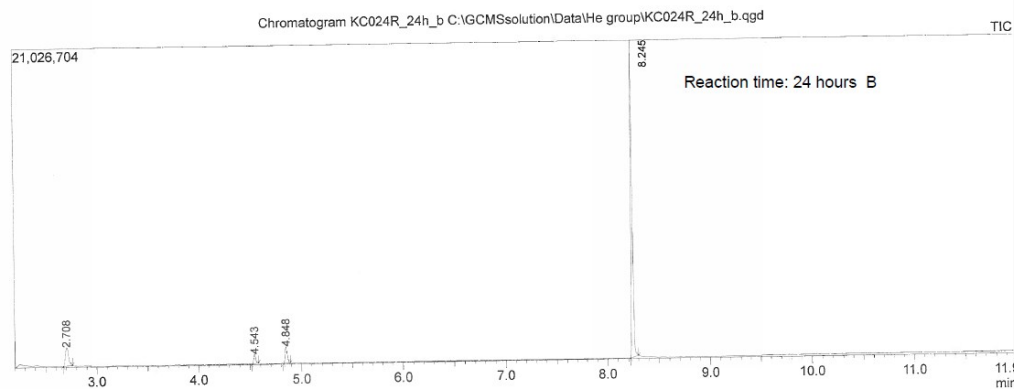

| Peak# | R. Time | Area     | Area%  | Name                    |
|-------|---------|----------|--------|-------------------------|
| 1     | 2.708   | 2516318  | 9.99   | Phenylethyne            |
| 2     | 4.543   | 855522   | 3.40   | Benzene, iodo-          |
| 3     | 4.848   | 1452506  | 5.77   | Benzonitrile, 2-methyl- |
| 4     | 8.245   | 20351556 | 80.84  | Diphenylacetylene       |
|       |         | 25175902 | 100.00 |                         |

**Figure S19.** GC-MS results for the reaction between iodobenzene and phenylacetylene in DMF for 24 hr.
